# Supplementary material
Source: HighWire-hosted journal article supplement (https://erj.ersjournals.com/content/54/6/1900826)
Supplement: inline-supplementary-material-1 [file inline-supplementary-material-1.pdf]

## Supplementary Appendix

This appendix has been provided by the authors to give readers additional information about their work.

Supplement to:

**The effects of Marijuana smoking on lung function in older people.**

**Manuscript ID ERJ-00826-2019.R1**

<sup>1</sup>Wan C Tan, M.D, <sup>2</sup>Jean Bourbeau, M.D., <sup>3</sup>Shawn D Aaron, M.D, <sup>1</sup>James C Hogg, M.D, <sup>4</sup> François Maltais, M.D, <sup>5</sup>Paul Hernandez, M.D, <sup>6</sup>Darcy D Marciniuk, M.D, <sup>7</sup>Kenneth R Chapman, M.D, <sup>8</sup>Teresa To, Ph.D, <sup>9</sup>J Mark FitzGerald, M.D., <sup>10</sup>Brandie L Walker, M.D, <sup>9</sup>Jeremy Road, M.D, <sup>1</sup>Trevor Yau, <sup>1</sup>Liyun Zheng, B.Sc, <sup>1</sup>Guohai Zhou, PhD, <sup>11</sup>Denis O'Donnell, M.D, <sup>1</sup>Don D Sin. M.D., on behalf of the CanCOLD Collaborative Research Group.\* [ please see acknowledgements]

**Supplement to:**

Wan C Tan, M.D, Jean Bourbeau, M.D., Shawn Aaron et al. on behalf of the CanCOLD Collaborative Research Group.\*

**1. List of CONTENTS**

1. List of contents
2. List of Investigators/ CanCOLD Collaborative Research Group
3. Methods: Canadian Obstructive Lung Disease (COLD) ( baseline cross-sectional phase of study):
4. Methods: Canadian Cohort of Obstructive Lung Disease ( CANCOLD) ( longitudinal phase)
5. Methods: Marijuana Questionnaire:
6. Respiratory symptoms definitions
7. Statistical Analysis:
  - a. Sample size calculation;
  - b. Missing data handling
  - c) Sensitivity analyses on COPD as covariate
  - d) Checking assumptions of linear mixed effect models.
8. Figure E1. Flow Diagram .The selection of participants for analysis of lung function: in Cross-sectional analysis, n=5291 participants. In longitudinal analysis, n=1285 participants.

9. Table E1. Comparison of demographic characteristics, tobacco and marijuana smoking status, for cross-sectional cohort COLD, and longitudinal cohort CanCOLD at 4 Visits [V0, V1, V2, V3]
10. Table E2. Multivariable Logistic Regression Models and test for trend for the association between any marijuana smoking subgroups by Joint-years cut-offs (controlled for pack-years ) and Post-bronchodilator  $FEV_1/FVC < 0.7$ .
11. Table E3: Multivariable Logistic Regression Models and test for trend for the association between tobacco smoking subgroups burden of Pack-years cut-offs (controlled for joint-years ) and Post-bronchodilator  $FEV_1/FVC < 0.7$ .
12. Table E4. Results from mixed effects regression models for marijuana smokers and tobacco smokers showing the longitudinal lung function decline (adjusted for pack-years or joint-years) shown as rate of change in FVC,
13. References:

## **2. List of collaborators**

\*CanCOLD Collaborative research Group: Jonathon Samet (the Keck School of Medicine of USC, California, USA); Milo Puhan (John Hopkins School of Public Health, Baltimore, USA ); Qutayba Hamid (McGill University, Montreal, Qc, Canada); Carole Baglolle, Palmina Mancino, Yvan Fortier, (University of McGill, Montreal, QC, Canada); Joe Comeau, Harvey Coxson, Miranda Kirby, Jonathon Leipsic, Cameron Hague (University of British Columbia James Hogg Research Center, Vancouver, BC, Canada); Mohsen Sadatsafavi (University of British Columbia, Vancouver, BC); Andrea Gershon (University of Toronto); Pei-Zhi Li, Denis Jensen (McGill University, Montreal, QC,Canada); Christine Lo, Sarah Cheng, Elena Un, Cindy Fung, Nancy Haynes, Wen Tian Wang, Jijie Xu, Faize Faroon (UBC James Hogg Research Center, Vancouver, BC); Zhi Song (McGill University, Montreal, QC, Canada ); Jane Duke (University of Toronto, Toronto, ON, Canada); Curtis Dumonceaux, (University of Calgary, Calgary, AB, Canada); Scott Fulton, (University of Halifax, Halifax, NS, Canada ); Kathy Vandemheen, (University of Ottawa, Ottawa, ON, Canada); Matthew McNeil, Kate Whelan (Queen's University, Kingston, ON, Canada); Cynthia Brouillard (University of Laval, Quebec City, QC, Canada); Ron Clemens, Janet Baran (University of Saskatchewan, Saskatoon, SK, Canada).

### **3. Canadian Obstructive Lung Disease (COLD) ( baseline cross-sectional phase of study):**

#### **METHODS**

The Canadian Obstructive Lung Disease [COLD] initiative was a cross-sectional multisite, nation-wide, population-based, epidemiological study on lung health, that was initiated in Vancouver in August 2005 and completed in 9 sites in Canada by September 2009.

The design and rationale of the ‘COLD’ study were identical to that conducted for the Vancouver site of the international Burden of Obstructive Lung Disease [ BOLD] initiative, the full details of which has been published elsewhere<sup>1</sup>. The details of the COLD study was also previously published.

Briefly, random samples were drawn from census data from Statistics Canada (Survey and Analysis Section; Victoria, Canada) and comprised of non-institutionalized adults, aged 40 years and older in nine urban cities across Canada (Vancouver, Montreal, Toronto, Halifax, Calgary, Quebec City, Kingston, Saskatoon and Ottawa). Recruitment was conducted by Nordic Research Group (NRG) Research group (Vancouver, Canada) by random telephone digit dialling to identify eligible who were invited to attend a clinic visit to complete interviewer administered respiratory questionnaires and to perform pre- and post-bronchodilator spirometry. The mean clinic visit participation rate was 74% (range 63–87% across 9 sites)<sup>2</sup>. A random sample of 6,592 persons were recruited into the cross-sectional phase of the initiative.

#### **4. Canadian Cohort of Obstructive Lung Disease ( CANCOLD) ( longitudinal phase)<sup>3</sup>:**

##### **Methods**

We enrolled subjects from a random sample of 6,592 persons recruited from 9 sites across Canada in the cross-section phase of the COLD study [ see page 4 in this supplementary appendix] to form the CANCOLD prospective cohort which included spirometrically-defined ( FEV1/FVC<0.7) COPD ( GOLD 1 , GOLD 2-4) and two aged- and sex-matched balanced subsets of non-COPD ( never-smoking and ever-smoking/' at risk' individuals). Participants were 40 years and older who were: i) healthy persons who never smoked (never-smokers) more than 1/20 pack year or total of more than 365 tobacco cigarettes in a lifetime, and post-bronchodilator FEV1/FVC greater than 0.7; ii): smokers (ever-smokers) with post-bronchodilator FEV1/FVC greater than 0.7; iii) mild COPD[ GOLD grade 1] (post-bronchodilator FEV1/FVC< 0.7 &FEV1pred. greater than 80%); iv) moderate COPD [GOLD grade 2] (FEV1/FVC< 0.7 and FEV1pred<80%>50%); and severe to very severe COPD [ GOLD grade 3 and 4 (FEV1/FVC< 0.7 & FEV1pred<50%)<sup>3</sup> Full subject assessments of spirometry, full lung function tests, cardiopulmonary exercise tests, computed tomography scans of the lungs were performed every 18 months , the full details, were previously described <sup>3</sup> . For this analysis 1285 subjects had marijuana and tobacco smoking data and longitudinal follow-up assessments. Details of the selection of participants are shown in Figure E1.

## 5. Marijuana Questionnaire

### *Pot/marijuana Smoking*

Now I am going to ask you about recreational smoking other than cigarettes.

1. Have you ever smoked pot/marijuana? Yes ☐ 1 A1  
No ☐ 2

*If the answer is Yes, ask the following questions:*

- 1A. How old were you when you first started smoking \_\_\_\_\_ years old A2  
pot/marijuana?

- 1B. Have you smoked pot/marijuana in the past year? Yes ☐ 1 A3  
No ☐ 2

- 1C. If you have stopped pot/marijuana, how old were \_\_\_\_\_ years old A4  
you when you last stopped? (If the participant has  
not stopped smoking, record as code '99'.)

*! Choose to respond to the most appropriate answers below; choose one answer for "joints" [ 1D, 1D.2, 1D.3 or 1D.6] and one answer for "Grams" [ 1D.4 or 1D.5]:*

- 1D. On average over the entire time that you \_\_\_\_\_ joints/week A5  
smoke(d), about how many joints per week  
do (did) you smoke?

- 1D.2. On average over the entire time that you \_\_\_\_\_ joints/month A5.1  
smoke(d), about how many joints per month  
do (did) you smoke?

- 1D.3. On average over the entire time that you \_\_\_\_\_ joints/year A5.2  
smoke(d), about how many joints per year  
do (did) you smoke?

ID.4 On average over the entire time that you \_\_\_\_\_ gram/week A5.3  
smoke(d), about how many grams per week  
do (did) you smoke?

1D.5 On average over the entire time that you \_\_\_\_\_ grams/month A5.4  
smoke(d), about how grams per month  
do (did) you smoke?

1D.6 On average over the entire time that you \_\_\_\_\_ joints ever smoked A5.5  
smoke(d), about how many joints have you  
ever smoked?

*! Choose most appropriate response below:*

1E. In an average week how many days do (did) \_\_\_\_\_ no. of days per week A6  
you smoke pot/marijuana?

1E.2 In an average month how many days do (did) \_\_\_\_\_ no. of days per month A6.1  
you smoke pot/marijuana?

1E.3 On average how many days have you smoked pot/marijuana in total? A6.2

1F \*How many years have you smoked pot/marijuana? \_\_\_\_\_ no. of years A7

2. Would you be willing to be contacted again for future studies on lung health?

Yes ☐ 1

A8

No ☐ 2

Completed by: \_\_\_\_\_

A9

*\* the minimum number of years for any "ever marijuana" smoker is 1*



## **6. Definitions of *Chronic Respiratory symptoms***

Chronic cough or chronic phlegm was defined as cough or phlegm not occurring during a ‘cold’ and on most days for as much as three months each year for 2 years (ref). Wheezing was the presence of “episodes of wheezing or whistling in the chest associated with feeling of shortness of breath, in the past 1 year not occurring during a cold”.<sup>4</sup> Breathlessness was defined as “I walk slower than people of the same age on the level because of breathlessness or have to stop for breath when walking at my own pace on the level” (mMRC dyspnoea scale 2 [ 0-4] or greater).<sup>5</sup>

## **7. Statistical analyses**

### ***a) Sample size calculation for CanCOLD cohort:***

Details of the sample size calculation to ensure an adequate sample size to assess the questions that relate to the progression of COPD( annual decline in FEV<sub>1</sub>) has been previously published<sup>3</sup> Briefly we used the tables in Hedeker et al<sup>6</sup>, for the longitudinal data, with 4 measurement occasions and assuming that the data was auto-correlated ( autocorrelation of 0.5 between observations on the same subject), we have adequate sample size to detect a medium effect size of 0.5SD for linear between group trend with about 133 subjects per group. This estimate allowed a 10% attrition and alpha=0.05, with 80% power. Assuming SD of annual decline in FEV<sub>1</sub> of 30-44mls, this would allow change of 15 to 22 mls/year over the follow-up period.<sup>3,7</sup>

### ***b) missing and irregularly spaced measured data handling:***

In the cross-sectional analyses, for logistic regression. listwise deletion was used to handle data; predictors missing in the model were excluded from the computation of the estimates.

In the longitudinal analysis, not all subjects remain in the study for the entire period of the study<sup>8</sup>. In this prospective, non interventional, naturalistic cohort, individuals varied in the number of repeated measurements they contributed and at the time at which these were obtained, due to dropouts or scheduling availabilities.

Because mixed-effects regression models are quite robust to missing data and irregularly spaced measurement occasions<sup>9</sup>, we used the statistical approach of linear mixed effect modeling [Using the ‘proc mixed’ procedure in SAS] which used all of the available data from each subject, regardless of when it was specifically obtained.<sup>9</sup>

### ***c) sensitivity analyses on COPD as covariate***

Sensitivity analyses were performed in the assessment of the effect of marijuana smoking on decline in FEV, a) by including and excluding COPD as covariate to address the possibility that

presence of COPD may increase the decline in FEV1; b) by excluding baseline FEV1 as covariate to address the possibility of regression to the mean.

#### d) Checking assumptions of linear mixed effect models

Linear mixed effect model has been widely used in previous literature for outcomes such as FEV1 decline in general (1–7) and in longitudinal marijuana studies [Tashkin DP et al. Am J Respir Crit Care Med 1997; 155(1): 141-148.; Sherrill DL, et al. Int J Epidemiol 1991; 20(1): 132-137.; Hancox RJ, et al.. Eur Respir J 2010; 35(1): 42-47.]

Within our linear mixed effect model, we have included a time interaction term for each time-varying variable to account for the nature of time-varying variables.

We have also check the linear mixed effect model assumptions to ensure the validity of the model. The diagnostic plots for the four models [ clockwise 1-4 in main table 3] are shown below. Based on the Pearson residuals plots (the top left panel), the homoscedasticity of variance assumption was satisfied. The linearity assumption was also satisfied as the plots did not show an obvious non-linear pattern. Based on the histogram and QQ-plot of the Pearson residuals (top right and bottom left), there is no obvious departure from a normal distribution. We have also check for the presence of auto-correlation to ensure the independency of the residuals.

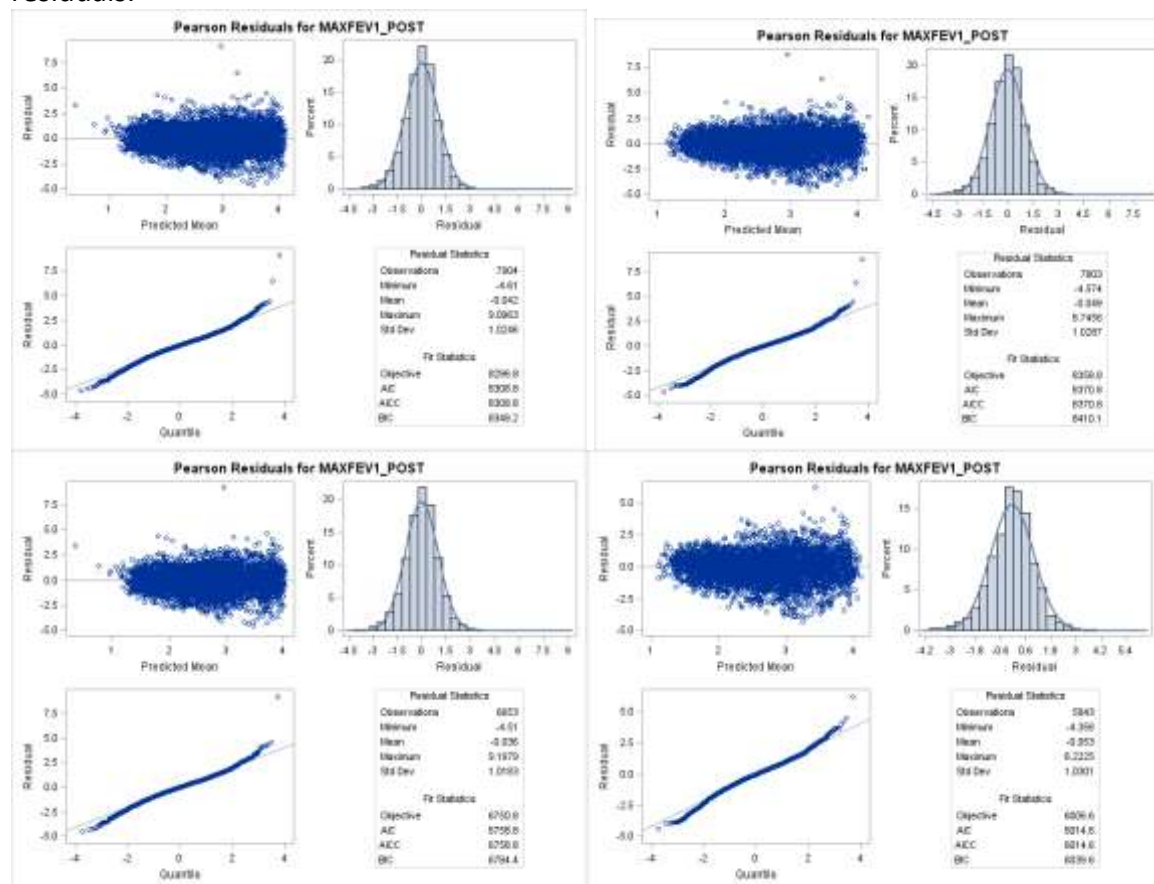

**Reference**

1. Tkacova R, Dai DLY, Vonk JM, Leung JM, Hiemstra PS, van den Berge M, et al. Airway hyperresponsiveness in chronic obstructive pulmonary disease: A marker of asthma-chronic obstructive pulmonary disease overlap syndrome? *J Allergy Clin Immunol*. 2016;138(6):1571-1579.e10.
2. Celli BR, Thomas NE, Anderson JA, Ferguson GT, Jenkins CR, Jones PW, et al. Effect of pharmacotherapy on rate of decline of lung function in chronic obstructive pulmonary disease: results from the TORCH study. *Am J Respir Crit Care Med*. 2008 Aug 15;178(4):332–8.
3. Calverley PMA, Anderson JA, Brook RD, Crim C, Gallot N, Kilbride S, et al. Fluticasone Furoate, Vilanterol, and Lung Function Decline in Patients with Moderate Chronic Obstructive Pulmonary Disease and Heightened Cardiovascular Risk. *Am J Respir Crit Care Med*. 2018 01;197(1):47–55.
4. Kim SJ, Lee J, Park YS, Lee C-H, Yoon HI, Lee S-M, et al. Age-related annual decline of lung function in patients with COPD. *Int J Chron Obstruct Pulmon Dis*. 2015 Dec 30;11:51–60.
5. Obeidat M, Li X, Burgess S, Zhou G, Fishbane N, Hansel NN, et al. Surfactant protein D is a causal risk factor for COPD: results of Mendelian randomisation. *Eur Respir J*. 2017;50(5).
6. Kirby M, Tanabe N, Tan WC, Zhou G, Obeidat M, Hague CJ, Leipsic J, Bourbeau J, Sin DD, Hogg JC, Coxson HO, Can CCRG, Canadian Respiratory Research N, CanCold Collaborative Research Group. Total Airway Count on Computed Tomography and the Risk of Chronic Obstructive Pulmonary Disease Progression. Findings from a Population-based Study. *Am J Respir Crit Care Med* 2018: 197(1): 56-65.
7. Tan WC, Bourbeau J, Aaron SD, Zhou G, Maltais F, Hernandez P, Fitzgerald JM, Marciniuk DD, Walker BL, Sin DD. GOLD 2017 Classification and Lung Function Decline in Chronic Obstructive Pulmonary Disease. *Am J Respir Crit Care Med* 2017.

#### e) Statistical Model building

Our full list of confounders include: asthma status, COPD status, medication use, pack years of tobacco use, joint years of marijuana use, sex, baseline age, baseline BMI, baseline FEV1 as well as their interaction with time. We used the backward procedure for model selection. Sex, baseline age, baseline BMI and baseline FEV1 and their interaction with time were forced to be included into the model because of their biological importance on FEV1. Asthma status, COPD status and medication use were removed from the final model based on the lowest AIC.

### 8. Figure E1.

The selection of participants for analysis of lung function: in Cross-sectional analysis, n=5291 participants. In longitudinal analysis, n=1285 participants. Never smokers= never smokers of either marijuana or tobacco; smokers of were either smokers of marijuana only or tobacco only or were dual smokers of both.

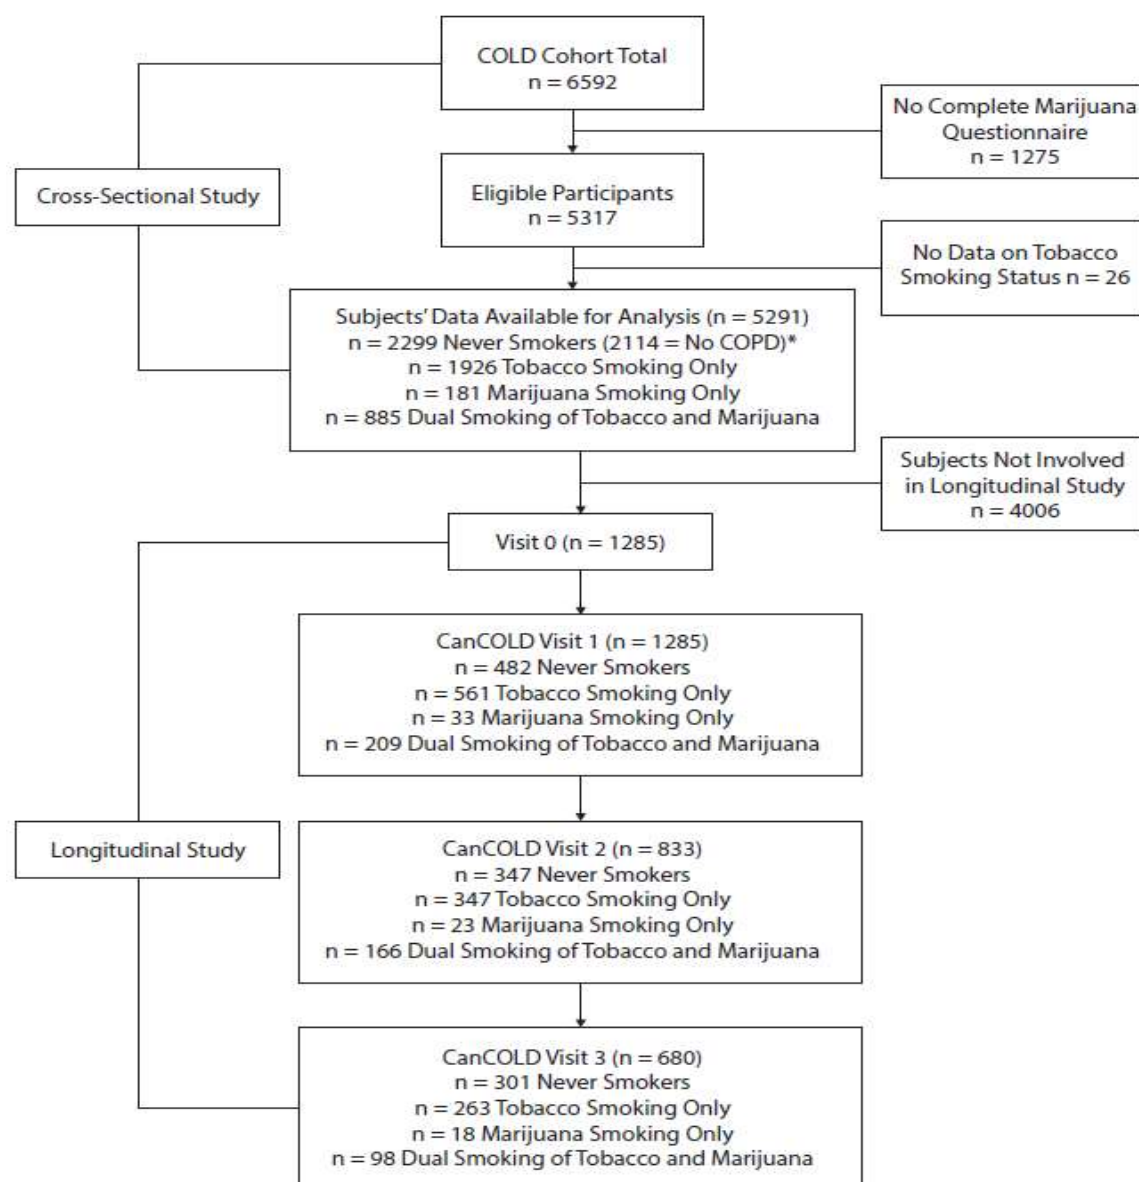

**9. Table E1. Comparison of Demographic characteristics, tobacco and marijuana smoking status, for cross-sectional cohort COLD, and longitudinal cohort CanCOLD at 4 Visits [V0, V1, V2, V3]**

|                                 | Cross-Sectional Phase |                             | Longitudinal Phase          |                              |                              |         |
|---------------------------------|-----------------------|-----------------------------|-----------------------------|------------------------------|------------------------------|---------|
| Variable                        | COLD<br>( n = 5291)   | CanCOLD Visit 0<br>(n=1285) | CanCOLD Visit 1<br>(n=1285) | CanCOLD Visit 2**<br>(n=832) | CanCOLD Visit 3**<br>(n=680) | P-value |
| <b><u>Demographics</u></b>      |                       |                             |                             |                              |                              |         |
| <b>Age</b> , mean (sd)          | 59.76 (11.59)         | 65.10 (9.93)*               | 67.5 ( 9.80 ) *             | 68.94 (9.65) * #             | 70.44 (9.41) * # §           | <.0001  |
| <b>BMI</b> , mean (sd)          | 27.93 (7.13)          | 27.83 (9.92)                | 27.73 ( 5.46 )              | 27.74 (5.57)                 | 27.45 (5.62)                 | 0.6537  |
| <b>YSchool</b> , mean (sd)      | 15.41 (3.72)          | 15.53 (3.76)                | 15.54 (3.77 )               | 15.43 (3.58)                 | 15.54 (3.58)                 | 0.8699  |
| <b>Sex</b> , n(%)               |                       |                             |                             |                              |                              | <.0001  |
| male                            | 2443 (46.17)          | 712 (55.41) *               | 712 (55.41) *               | 425 (53.01) *                | 354 (52.10) *                |         |
| female                          | 2848 (53.83)          | 573 (44.59)                 | 573 (44.59)                 | 375 (46.99)                  | 326 (47.90)                  |         |
| <b><u>Race</u></b> , n(%)       |                       |                             |                             |                              |                              | <.0001  |
| Caucasian                       | 4789 (90.51)          | 1213 (94.4)                 | 1213 (94.4)                 | 787 (94.59)                  | 643 (94.5)                   |         |
| Asian                           | 287 (5.42)            | 38 (2.96)                   | 38 (2.96)                   | 21 (2.52)*                   | 16 (2.36)*                   |         |
| Other                           | 108 (2.04)            | 22 (1.71)                   | 22 (1.71)                   | 17 (2.04)                    | 16 (2.36)                    |         |
| African                         | 66 (1.25)             | 8 (0.62)                    | 8 (0.62)                    | 5 (0.6)                      | 4 (0.63)                     |         |
| Hispanic                        | 41 (0.77)             | 4 (0.31)                    | 4 (0.31)                    | 2(0.24)                      | 1 (0.16)                     |         |
| <b><u>Tobacco Smoking</u></b>   |                       |                             |                             |                              |                              | <.0001  |
| n(%)                            |                       |                             |                             |                              |                              |         |
| Never                           | 2480 (46.87)          | 515 (40.08)                 | 468 (36.42)                 | 322 (40.35)                  | 288 (42.42)                  |         |
| Former                          | 2085 (39.41)          | 548 (42.65) *               | 623 (48.48) *               | 381 (47.74) † #              | 316 (46.45) † #              |         |
| Current                         | 726 ( 13.72)          | 222 (17.28) *               | 194 (15.1) * †              | 95 (11.9) *                  | 76 (11.13) *                 |         |
| <b>Pack_years</b> , mean (sd)   | 13.24 (21.40)         | 17.33 (24.15)               | 17.33 (24.15 ) *            | 16.31 (23.38 ) *             | 15.75 (22.18)                |         |
|                                 |                       |                             |                             |                              |                              | <.0001  |
| <b><u>Marijuana Smoking</u></b> |                       |                             |                             |                              |                              | 0.0784  |
| n(%)                            |                       |                             |                             |                              |                              |         |
| Never                           | 4225 (79.85)          | 1043 (81.17)                | 1043 (81.17)                | 693 (94.29)                  | 569 (83.65)                  |         |
| Former                          | 346 (6.54)            | 151 (11.75)                 | 151 (11.75)                 | 89 (10.70)                   | 75 (11.01)                   |         |
| Current                         | 720 (13.61)           | 91 (7.08)                   | 91 (7.08)                   | 50 (6.01)                    | 36 (5.35)                    |         |
| <b>Joint_years</b> , mean (sd)  | 2.73 (8.05)           | 3.16 (9.20)                 | 3.16 (9.20)                 | 2.49 (8.04)                  | 2.48 (8.07)                  | 0.5047  |

Race, pack\_years, pot\_status, and pot\_years are retrieved from COLD;

NOTE2: \* = different from COLD; † = different from V0; # = different from V1;§= different from V2

\*\* the unequal numbers were due to different scheduling availabilities in an ongoing longitudinal study.

**10. Table E2. Multivariable Logistic Regression Models and test for trend for the association between any marijuana smoking subgroups by Joint-years cut-offs (controlled for pack-years ) and Post-bronchodilator FEV<sub>1</sub>/FVC < 0.7.: cross sectional data COLD**

| Marijuana Subgroups       | N    | Adjusted Odds Ratio (95%C.I.) | Cochran-Armitage Trend Test P-value |
|---------------------------|------|-------------------------------|-------------------------------------|
| Never Smokers (Reference) | 2299 | 1                             |                                     |
| Marijuana subgroups:      |      |                               |                                     |
| >0-1 joint years          | 253  | 0.631(0.106,1.407)            | <.0001#                             |
| >1-5 joint-years          | 364  | 1.334(0.924,1.928)            |                                     |
| >5-20 joint-years         | 262  | 1.210(0.802,1.826)            |                                     |
| >20 joint-years           | 185  | 2.302(1.468,3.609)*           |                                     |

Model is adjusted for age, sex, BMI, post-bronchodilator FVC and pack-years. Test for interaction for marijuana smoking and tobacco smoking was not significant.\*significant association between marijuana smoking burden and post-bronchodilator FEV<sub>1</sub>/FVC < 0.7. #Significant test of trend for association between increasing joint-years with post-bronchodilator FEV<sub>1</sub>/FVC < 0.7.

**11. Table E3: Multivariable Logistic Regression Models and test for trend for the association between tobacco smoking subgroups burden of Pack-years cut-offs (controlled for joint-years ) and Post-bronchodilator FEV<sub>1</sub>/FVC < 0.7.: Cross-sectional data COLD**

| Tobacco Subgroups         | N    | Adjusted Odds Ratio (95%C.I.) | Cochran-Armitage Trend Test P-value |
|---------------------------|------|-------------------------------|-------------------------------------|
| Never Smokers (Reference) | 2299 | 1                             |                                     |
| Tobacco subgroups:        |      |                               |                                     |
| >0-1 pack-years           | 124  | 0.883(0.508,1.536)            | <.0001#                             |
| >1-5 pack-years           | 378  | 0.994(0.719,1.374)            |                                     |
| >5-20 pack-years          | 873  | 1.475(1.190,1.829)*           |                                     |
| >20 pack-years            | 1374 | 3.930(3.297,4.685)*           |                                     |

Model is adjusted for age, sex, BMI, and joint-years. Test for interaction for marijuana smoking and tobacco smoking was not significant.\*Significant association between tobacco smoking burden and post-bronchodilator FEV<sub>1</sub>/FVC < 0.7. #Significant test of trend for association between increasing pack-years with post-bronchodilator FEV<sub>1</sub>/FVC < 0.7.

**12. Table E4. Results from mixed effects regression models for marijuana smokers and tobacco smokers showing the longitudinal lung function decline (adjusted for pack-years or joint-years) shown as rate of change in FVC,**

|                | Predictor Variables                  | N   | Rate of change in FVC (ml/yrs) |               |              |         |
|----------------|--------------------------------------|-----|--------------------------------|---------------|--------------|---------|
|                |                                      |     | $\beta$<br>Coefficient         | 95% CI        | Std<br>Error | P value |
| <b>Model 1</b> | <b>Never smokers [reference]</b>     | 482 | -7.36                          |               |              |         |
|                | <b>Marijuana smoking</b>             |     |                                |               |              |         |
|                | <b>joint-years groups:</b>           |     |                                |               |              |         |
|                | >0-1                                 | 56  | -4.96                          | -20.07,10.15  | 7.71         | 0.5197  |
|                | >1-5                                 | 72  | -23.32                         | -42.08,-4.55  | 9.57         | 0.0149* |
| <b>Model 2</b> | <b>Never smokers [reference]</b>     | 482 | -5.84                          |               |              |         |
|                | <b>Tobacco smoking</b>               |     |                                |               |              |         |
|                | <b>pack-years groups:</b>            |     |                                |               |              |         |
|                | >0-1                                 | 59  | 5.85                           | -16.34,28.03  | 11.32        | 0.6055  |
|                | >1-5                                 | 65  | -8.86                          | -24.70,6.99   | 8.08         | 0.2733  |
| <b>Model 3</b> | <b>Never smokers [reference]</b>     | 482 | -7.96                          |               |              |         |
|                | <b>Heavy marijuana smoking</b>       |     |                                |               |              |         |
|                | <b>(&gt;20 Joint-years):</b>         |     |                                |               |              |         |
|                | <b>Current</b>                       | 34  | -32.26                         | -63.68,-0.83  | 16.02        | 0.0442* |
|                | <b>Former</b>                        | 17  | -47.68                         | -85.17,-10.18 | 19.12        | 0.0127* |
| <b>Model 4</b> | <b>Never smokers [reference]</b>     | 482 | -3.93                          |               |              |         |
|                | <b>Heavy tobacco smoking (&gt;20</b> |     |                                |               |              |         |
|                | <b>Pack-years):</b>                  |     |                                |               |              |         |
|                | <b>Current</b>                       | 272 | -17.41                         | -32.07,-2.74  | 7.48         | 0.0200* |
|                | <b>Former</b>                        | 167 | -0.51                          | -9.26,8.23    | 4.46         | 0.9082  |

Never smokers are never smokers of both marijuana and tobacco. Smoking groups are stratified by baseline pack-years or joint-years. Current and former smoking are defined by baseline smoking status. In each model the predictor variables are: a) time-varying variables (assessed at each visit) of marijuana or tobacco smoking exposure (pack-years or joint-years); BMI, follow-up time and FVC; b) other variables :sex, baseline FVC, baseline age.

\*significantly different compared with that of never-smokers of both marijuana and tobacco. The  $\beta$  coefficient is the difference in the mean rate of change of FVC compared with the reference (never smokers of both) and corrected for exposure (either joint-years or pack-years accordingly). The  $\beta$  coefficient for never smokers of tobacco and marijuana is computed as the sum of the  $\beta$  coefficient for age, BMI, follow-up time and baseline FVC.



13.

**Table E5. Sensitivity analysis :Results from mixed effects regression models for marijuana smokers and tobacco smokers showing the longitudinal lung function decline (adjusted for pack-years or joint-years) shown as rate of change in FEV<sub>1</sub> ( baseline FEV1 excluded as covariate)**

| Predictor Variables                      | N   | Rate of change in FEV <sub>1</sub> (ml/yrs) |               |              |         |
|------------------------------------------|-----|---------------------------------------------|---------------|--------------|---------|
|                                          |     | $\beta$<br>Coefficient                      | 95% CI        | Std<br>Error | P value |
| <b>Model 1</b>                           |     |                                             |               |              |         |
| Never smokers [reference]                | 482 | -0.693                                      |               |              |         |
| Marijuana smoking<br>joint-years groups: |     |                                             |               |              |         |
| >0-1                                     | 56  | -6.69                                       | -17.49,4.11   | 5.50         | 0.2248  |
| >1-5                                     | 72  | -18.78                                      | -35.93,-1.62  | 8.75         | 0.0320* |
| >5-20                                    | 63  | -0.96                                       | -12.44,10.52  | 5.85         | 0.8694  |
| >20                                      | 51  | -32.41                                      | -49.36,-15.46 | 8.64         | 0.0002* |

In each model the predictor variables are: a) time-varying variables (assessed at each visit) of marijuana or tobacco smoking exposure (pack-years or joint-years); BMI, follow-up time; b) other variables :sex, baseline age.

\*significantly different compared with that of never-smokers of both marijuana and tobacco.

14.

## References

1. Buist AS, McBurnie MA, Vollmer WM, et al. International variation in the prevalence of COPD (the BOLD Study): a population-based prevalence study. *Lancet*. 2007;370(9589):741-750.
2. Tan WC, Sin DD, Bourbeau J, et al. Characteristics of COPD in never-smokers and ever-smokers in the general population: results from the CanCOLD study. *Thorax*. 2015;70(9):822-829.
3. Bourbeau J, Tan WC, Benedetti A, et al. Canadian Cohort Obstructive Lung Disease (CanCOLD): Fulfilling the need for longitudinal observational studies in COPD. *COPD*. 2014;11(2):125-132.
4. Fletcher CM, Elmes PC, Fairbairn AS, Wood CH. The significance of respiratory symptoms and the diagnosis of chronic bronchitis in a working population. *Br Med J*. 1959;2(5147):257-266.
5. Mahler DA, Wells CK. Evaluation of clinical methods for rating dyspnea. *Chest*. 1988;93(3):580-586.
6. Hedeker D. Sample size estimation for longitudinal designs with attrition: comparing time-related contrasts between two groups. *J Educ Behav Statist*. 1999;24(1):24.
7. Bridevaux PO, Gerbase MW, Probst-Hensch NM, Schindler C, Gaspoz JM, Rochat T. Long-term decline in lung function, utilisation of care and quality of life in modified GOLD stage 1 COPD. *Thorax*. 2008;63(9):768-774.
8. Laird NM. Missing data in longitudinal studies. *Stat Med*. 1988;7(1-2):305-315.
9. Gibbons RD, Hedeker D, DuToit S. Advances in analysis of longitudinal data. *Annu Rev Clin Psychol*. 2010;6:79-107.
