# Supplementary material
Source: HighWire-hosted journal article supplement (https://erj.ersjournals.com/content/54/6/1900826)
Supplement: inline-supplementary-material-2 [file inline-supplementary-material-2.pdf]

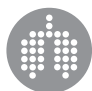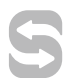

SHAREABLE PDF

# The effects of marijuana smoking on lung function in older people

Wan C. Tan<sup>1</sup>, Jean Bourbeau <sup>2</sup>, Shawn D. Aaron<sup>3</sup>, James C. Hogg<sup>1</sup>, François Maltais<sup>4</sup>, Paul Hernandez<sup>5</sup>, Darcy D. Marciniuk<sup>6</sup>, Kenneth R. Chapman <sup>7</sup>, Teresa To<sup>8</sup>, J. Mark FitzGerald<sup>9</sup>, Brandie L. Walker<sup>10</sup>, Jeremy Road<sup>9</sup>, Liyun Zheng<sup>1</sup>, Guohai Zhou<sup>1</sup>, Trevor Yau<sup>1</sup>, Andrea Benedetti<sup>2</sup>, Denis O'Donnell <sup>11</sup> and Don D. Sin<sup>1</sup>, on behalf of the CanCOLD Collaborative Research Group<sup>12</sup>

**Affiliations:** <sup>1</sup>The University of British Columbia, Center for Heart Lung Innovation, St Paul's Hospital, Vancouver, BC, Canada. <sup>2</sup>Research Institute McGill University Health Center, McGill University, Montreal, QC, Canada. <sup>3</sup>The Ottawa Hospital Research Institute, University of Ottawa, Ottawa, ON, Canada. <sup>4</sup>Institut Universitaire de cardiologie et de pneumologie de Québec, Université Laval, Quebec City, QC, Canada. <sup>5</sup>Dept of Medicine, Dalhousie University, Halifax, NS, Canada. <sup>6</sup>Respiratory Research Centre, University of Saskatchewan, Saskatoon, SK, Canada. <sup>7</sup>Toronto General Hospital Research Institute, University of Toronto, Toronto, ON, Canada. <sup>8</sup>Dalla Lana School of Public Health, University of Toronto, Toronto, ON, Canada. <sup>9</sup>University of British Columbia, Dept of Medicine, Vancouver General Hospital, Vancouver, BC, Canada. <sup>10</sup>Dept of Medicine, University of Calgary, Calgary, AB, Canada. <sup>11</sup>Division of Respiratory and Critical Care Medicine, Queen's University, Kingston, ON, Canada. <sup>12</sup>A list of members of the CanCOLD Collaborative Research Group can be found in the acknowledgements section.

**Correspondence:** Wan C. Tan, University of British Columbia, Centre for Heart Lung Innovation, St Paul's Hospital, Rm166, 1081 Burrard Street, Vancouver, BC, V6Z 1Y6, Canada. E-mail: wan.tan@hli.ubc.ca

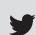

@ERSpublications

Prolonged heavy marijuana smoking increases the risk of COPD and accelerates FEV<sub>1</sub> decline in concomitant tobacco cigarette smokers beyond the effects of tobacco alone <http://bit.ly/2II2IEu>

**Cite this article as:** Tan WC, Bourbeau J, Aaron SD, *et al.* The effects of marijuana smoking on lung function in older people. *Eur Respir J* 2019; 54: 1900826 [https://doi.org/10.1183/13993003.00826-2019].

This single-page version can be shared freely online.

## ABSTRACT

**Background:** Previous studies have associated marijuana exposure with increased respiratory symptoms and chronic bronchitis among long-term cannabis smokers. The long-term effects of smoked marijuana on lung function remain unclear.

**Methods:** We determined the association of marijuana smoking with the risk of spirometrically defined chronic obstructive pulmonary disease (COPD) (post-bronchodilator forced expiratory volume in 1 s (FEV<sub>1</sub>)/forced vital capacity ratio <0.7) in 5291 population-based individuals and the rate of decline in FEV<sub>1</sub> in a subset of 1285 males and females, aged ≥40 years, who self-reported use (or non-use) of marijuana and tobacco cigarettes and performed spirometry before and after inhaled bronchodilator on multiple occasions. Analysis for the decline in FEV<sub>1</sub> was performed using random mixed effects regression models adjusted for age, sex and body mass index. Heavy tobacco smoking and marijuana smoking was defined as >20 pack-years and >20 joint-years, respectively.

**Results:** ~20% of participants had been or were current marijuana smokers with most having smoked tobacco cigarettes in addition (83%). Among heavy marijuana users, the risk of COPD was significantly increased (adjusted OR 2.45, 95% CI 1.55–3.88). Compared to never-smokers of marijuana and tobacco, heavy marijuana smokers and heavy tobacco smokers experienced a faster decline in FEV<sub>1</sub> by 29.5 mL·year<sup>-1</sup> (p=0.0007) and 21.1 mL·year<sup>-1</sup> (p<0.0001), respectively. Those who smoked both substances experienced a decline of 32.31 mL·year<sup>-1</sup> (p<0.0001).

**Interpretation:** Heavy marijuana smoking increases the risk of COPD and accelerates FEV<sub>1</sub> decline in concomitant tobacco smokers beyond that observed with tobacco alone.
